# Supplementary material for: Multi-omics analysis reveals PUS1 triggered malignancy and correlated with immune infiltrates in NSCLC
Source: publisher site journal article supplement (doi:10.18632/aging.205169), 2023-11-02
Supplement: Supplementary file [file aging-v15i21-205169-supplementary-material-SD1.pdf]

**SUPPLEMENTARY FIGURES**

**A** Expression of PUS1 in LUAD based on individual cancer stages

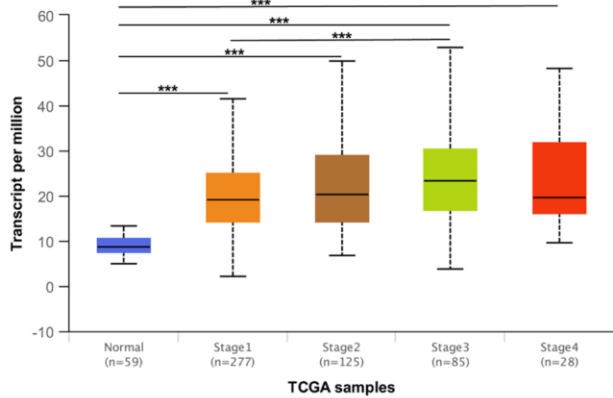

**C** Expression of PUS1 in LUAD based on patient's smoking habits

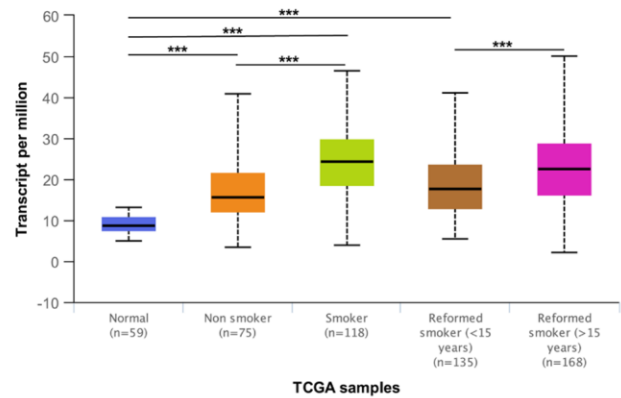

**B** Expression of PUS1 in LUSC based on individual cancer stages

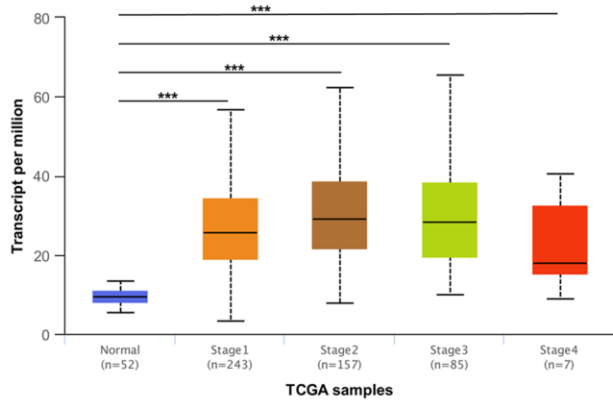

**D** Expression of PUS1 in LUSC based on patient's smoking habits

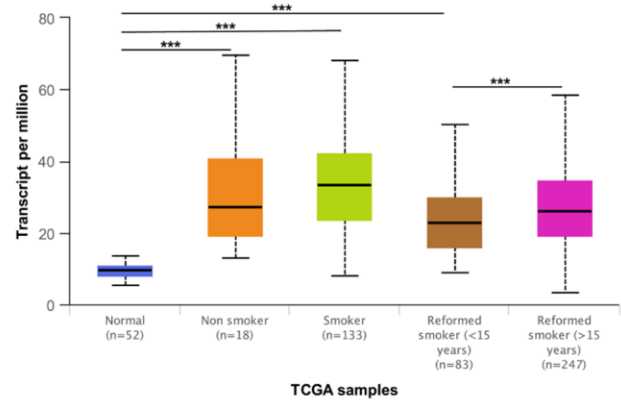

**Supplementary Figure 1.** (A, B) The relationship between PUS1 and stage according to TCGA-LUAD (A)/LUSC (B); (C, D) The relationship between PUS1 and smoking habits according to TCGA-LUAD (C)/LUSC (D).

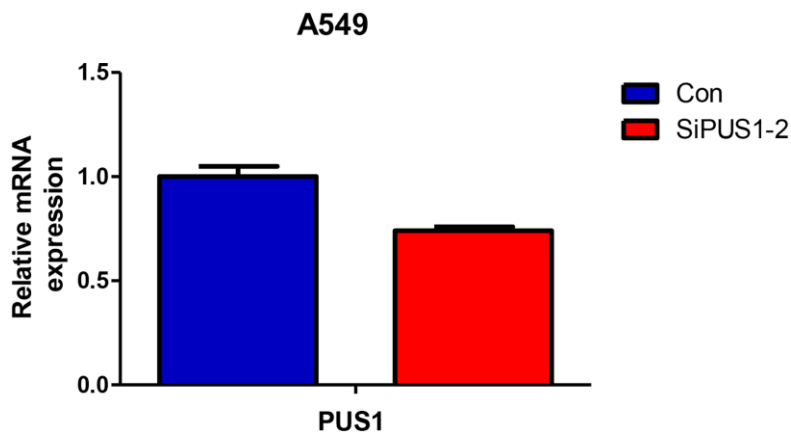

**Supplementary Figure 2.** The PUS1 expression after knock-down with PUS1-Si2 by RT-qPCR.

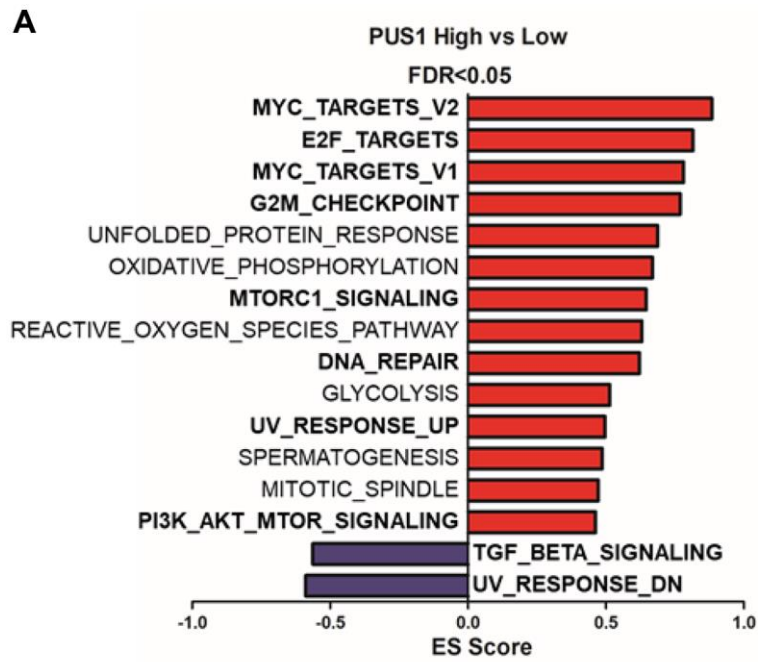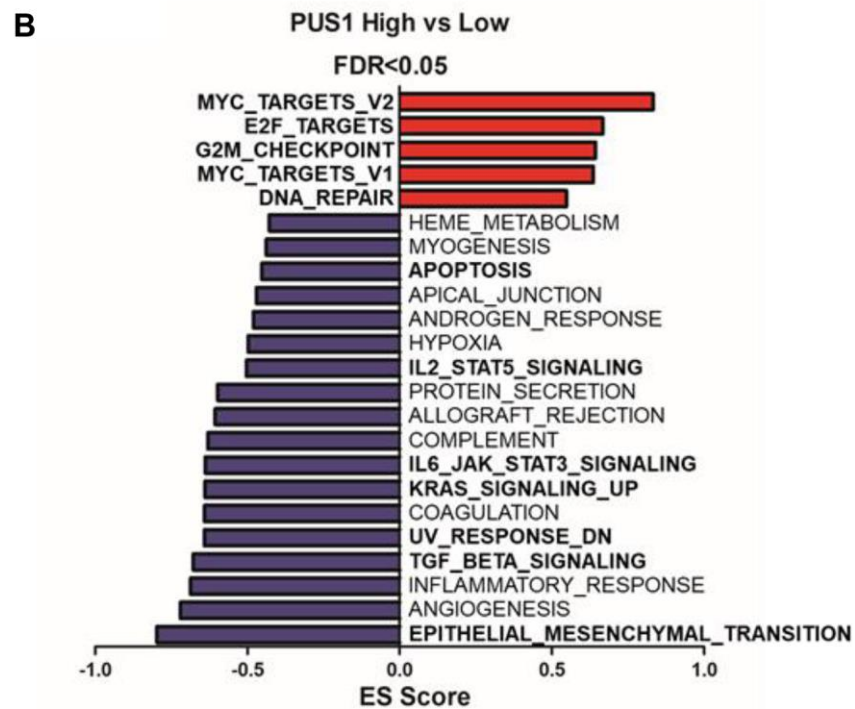

**Supplementary Figure 3.** (A, B) The GSEA analysis between PUS1 high and low patients in LUAD and LUSC (FDR < 0.05, Cutoff: median).
