# Supplementary material for: Multi-omics analysis reveals PUS1 triggered malignancy and correlated with immune infiltrates in NSCLC
Source: publisher site journal article supplement (doi:10.18632/aging.205169), 2023-11-02
Supplement: Supplementary file [file aging-v15i21-205169-supplementary-material-SD2.pdf]

## SUPPLEMENTARY TABLE

Supplementary Table 1. The primer pairs used for qPCR.

---

|       |   |                         |
|-------|---|-------------------------|
| PUS1  | F | CACGGGCGGGTTTAACTCCAAG  |
|       | R | GCTCAGGCGGTAGGTCTCATCC  |
| NOLC1 | F | GTAGCAGTGATGACTCAGAGGAG |
|       | R | CTGGAGGAATCCTCACTGCTAG  |
| MCM5  | F | GACTTACTCGCCGAGGAGACAT  |
|       | R | TGCTGCCTTTCCAGACGTGTA   |
| MYC   | F | CCTGGTGCTCCATGAGGAGAC   |
|       | R | CAGACTCTGACCTTTTGCCAGG  |
| XPO1  | F | CTACATCTGCCTCTCCGTTGCT  |
|       | R | CCAATACTTCCTCTGGTTTAGCC |

---
